# Supplementary figures and images for: Improving Infant Hydrocephalus Outcomes in Uganda: A Longitudinal Prospective Study Protocol for Predicting Developmental Outcomes and Identifying Patients at Risk for Early Treatment Failure after ETV/CPC
Source: MDPI journal article supplement (doi:10.3390/metabo12010078), 2022-01-14

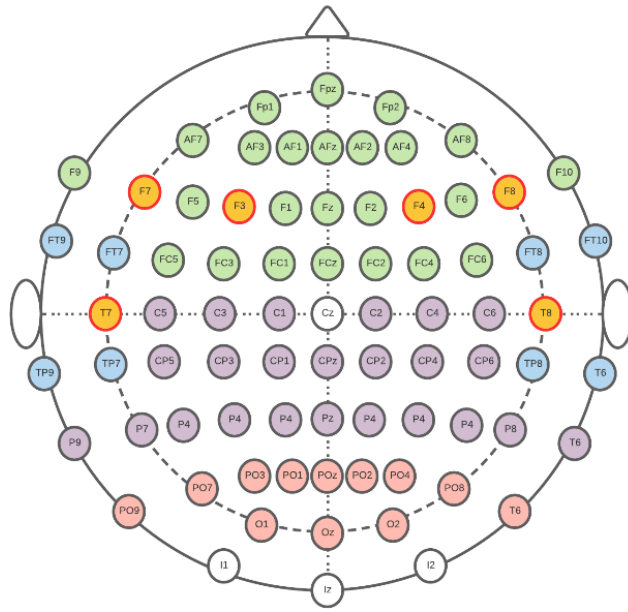

**Figure S1.** Illustration of the 10-10 EEG electrode system. FDNIRS-DCS locations are outlined in red.

Supplement: s1 [file s1]
